# Supplementary material for: Optimization of Fermentation Process of Pomegranate Peel and Schisandra Chinensis and the Biological Activities of Fermentation Broth: Antioxidant Activity and Protective Effect Against H2O2-induced Oxidative Damage in HaCaT Cells
Source: MDPI journal article supplement (doi:10.3390/molecules26113432), 2021-06-05
Supplement: s1 [file s1]

**Table S1.** Reagent information in the article.

| Name                                                 | Purity Grade | Manufacturer Information |
|------------------------------------------------------|--------------|--------------------------|
| NaOH                                                 | ≥96%(AR)     | Greagent                 |
| 2,2-diphenyl-1-picrylhydrazyl                        | /            | CATO                     |
| ABTS                                                 | /            | Beyotime                 |
| Ellagic acid standard                                | ≥ 98%(HPLC)  | STANDARD                 |
| Schisandrin B standard                               | ≥ 98%(HPLC)  | STANDARD                 |
| Analytical pure glucose powder                       | ≥ 98%        | Alfa                     |
| CCK-8 assay                                          | /            | Beyotime                 |
| DCFH-DA                                              | /            | Beyotime                 |
| H <sub>2</sub> O <sub>2</sub>                        | 31%(G2)      | Adamas                   |
| HCl                                                  | 37%(G1)      | Adamas                   |
| Salicylic acid                                       | 99%(RG)      | Adamas                   |
| FeSO <sub>4</sub> ·7H <sub>2</sub> O                 | ≥99.0%(AR)   | Greagent                 |
| K <sub>2</sub> S <sub>2</sub> O <sub>8</sub>         | ≥99.5%(AR)   | Greagent                 |
| Anhydrous ethanol                                    | ≥99.7%(AR)   | Greagent                 |
| Pyrogallol                                           | 98%+(RG)     | Adamas                   |
| Na <sub>2</sub> HPO <sub>4</sub> ·12H <sub>2</sub> O | ≥99%(AR)     | Greagent                 |
| NaH <sub>2</sub> PO <sub>4</sub>                     | ≥99.0%(AR)   | Greagent                 |
| DMEM                                                 | /            | Gibco                    |
| FBS                                                  | /            | Gibco                    |
| DPBS                                                 | /            | Gibco                    |
| DMSO                                                 | /            | Solarbio                 |
| Broth medium                                         | /            | HaiBo                    |
